# Supplementary material for: Serum bicarbonate stability study at room temperature – influence of time to centrifugation and air exposure on bicarbonate measurement reported according to the CRESS checklist
Source: publisher site journal article supplement (doi:10.1515/cclm-2022-1182), 2023-01-16
Supplement: Supplementary file 1 [file j_cclm-2022-1182_suppl_001.docx]

Supplementary material for the manuscript entitled:

Serum bicarbonate stability study at room temperature – influence of time to centrifugation and air exposure on bicarbonate measurement reported according to the CRESS checklist

Authors: Vesna Šupak-Smolčić, Lucija Franin, Mihovil Horvat, Pavica Šonjić, Rebeka Svatić, Dragana Antončić, Merica Aralica, Dara Metzner, Maja Šimac, Lidija Bilić-Zulle

Results of the serum bicarbonate stability study. Raw data for each participant at different times to centrifugation and air exposure conditions at room temperature. Outliers are shown as bold values.

|  |  | **Basal** | **C_0h_1h** | **C_0h_2h** | **OT_0h_1h** | **OT_0h_2h** | **WB_2h** | **C_2h_1h** | **C_2h_2h** | **OT_2h_1h** | **OT_2h_2h** | **WB_4h** | **C_4h_1h** | **C_4h_2h** | **OT_4h_1h** | **OT_4h_2h** |
| --- | --- | --- | --- | --- | --- | --- | --- | --- | --- | --- | --- | --- | --- | --- | --- | --- |
| Participant 1 | Replicate 1 | 29.3 | 30.8 | 31.4 | 27.4 | 27.1 | 30.6 | 30.2 | 30.2 | 27.6 | 26.1 | 29.8 | 29.7 | 29.5 | 27.4 | 26.0 |
|  | Replicate 2 | 29.0 | 30.0 | 30.2 | 27.7 | 26.1 | 29.4 | 30.1 | 29.8 | 28.1 | 25.9 | 29.2 | 28.8 | 28.0 | 27.3 | 25.7 |
|  | Replicate 3 | 29.1 | 30.0 | 29.7 | 27.1 | 26.5 | 29.3 | 29.3 | 29.4 | 27.9 | 25.9 | 28.7 | 28.7 | 28.1 | 27.1 | 25.6 |
|  | Median | 29.1 | 30.0 | 30.2 | 27.4 | 26.5 | 29.4 | 30.1 | 29.8 | 27.9 | 25.9 | 29.2 | 28.8 | 28.1 | 27.3 | 25.7 |
|  | CV% | 0.52 | 1.54 | 2.89 | 1.09 | 1.90 | 2.46 | 1.64 | 1.34 | 0.90 | 0.45 | 1.89 | 1.91 | 2.98 | 0.56 | 0.81 |
|  | PD% |  | 3.09 | 3.78 | -5.84 | -8.93 | 1.03 | 3.44 | 2.41 | -4.12 | -11.00 | 0.34 | -1.03 | -3.44 | -6.19 | -11.68 |
| Participant 2 | Replicate 1 | 28.7 | 30.2 | 29.8 | 27.6 | 25.9 | 30.2 | 29.1 | 28.9 | 28.0 | 26.6 | 28.5 | 27.8 | 28.2 | 27.1 | 25.3 |
|  | Replicate 2 | 29.2 | 29.2 | 29.4 | 27.1 | 26.3 | 29.3 | 28.9 | 29.3 | 27.6 | 26.3 | 28.5 | 28.7 | 28.4 | 26.7 | 25.0 |
|  | Replicate 3 | 28.7 | 29.6 | 29.2 | 26.9 | 26.1 | 29.3 | 29.4 | 28.0 | 27.4 | 26.2 | 28.0 | 28.0 | 27.8 | 26.4 | 25.0 |
|  | Median | 28.7 | 29.6 | 29.4 | 27.1 | 26.1 | 29.3 | 29.1 | 28.9 | 27.6 | 26.3 | 28.5 | 28.0 | 28.2 | 26.7 | 25.0 |
|  | CV% | 1.01 | 1.70 | 1.04 | 1.33 | 0.77 | 1.77 | 0.86 | 2.30 | 1.11 | 0.79 | 1.01 | 1.69 | 1.08 | 1.32 | 0.69 |
|  | PD% |  | 3.14 | 2.44 | -5.57 | -9.06 | 2.09 | 1.39 | 0.70 | -3.83 | -8.36 | -0.70 | -2.44 | -1.74 | -6.97 | -12.89 |
| Participant 3 | Replicate 1 | 28.0 | 28.9 | 29.1 | 27.1 | 25.3 | 28.5 | 28.4 | 27.9 | 25.8 | 24.3 | 27.9 | 27.0 | 27.9 | 26.1 | 25.1 |
|  | Replicate 2 | 28.1 | 28.5 | 28.6 | 26.2 | 25.5 | 27.2 | 27.8 | 27.9 | 26.0 | 23.7 | 27.6 | 27.6 | 27.2 | 26.0 | 24.9 |
|  | Replicate 3 | 27.8 | 28.4 | 28.1 | 26.1 | 25.1 | 28.0 | 27.6 | 27.5 | 26.1 | 23.7 | 27.9 | 27.0 | 27.5 | 26.3 | 24.6 |
|  | Median | 28.0 | 28.5 | 28.6 | 26.2 | 25.3 | 28.0 | 27.8 | 27.9 | 26.0 | 23.7 | 27.9 | 27.0 | 27.5 | 26.1 | 24.9 |
|  | CV% | 0.55 | 0.93 | 1.75 | 2.10 | 0.79 | 2.34 | 1.50 | 0.83 | 0.59 | 1.46 | 0.62 | 1.28 | 1.28 | 0.59 | 1.01 |
|  | PD% |  | 1.79 | 2.14 | -6.43 | -9.64 | 0.00 | -0.71 | -0.36 | -7.14 | -15.36 | -0.36 | -3.57 | -1.79 | -6.79 | -11.07 |
| Participant 4 | Replicate 1 | 24.1 | 24.0 | 24.0 | 21.3 | 20.4 | 23.9 | 24.1 | 24.0 | 22.7 | 21.8 | 24.7 | 23.8 | 24.0 | 22.7 | 21.5 |
|  | Replicate 2 | 23.3 | 23.4 | 23.1 | 21.9 | 20.6 | 23.7 | 23.8 | 23.8 | 22.4 | 21.6 | 24.5 | 23.1 | 23.7 | 22.6 | 22.0 |
|  | Replicate 3 | 23.4 | 23.4 | 23.3 | 22.2 | 20.6 | 23.5 | 23.5 | 24.2 | 22.6 | 21.4 | 24.0 | 23.3 | 23.4 | 22.6 | 21.9 |
|  | Median | 23.4 | 23.4 | 23.3 | 21.9 | 20.6 | 23.7 | 23.8 | 24.0 | 22.6 | 21.6 | 24.5 | 23.3 | 23.7 | 22.6 | 21.9 |
|  | CV% | 1.86 | 1.48 | 2.03 | 2.09 | 0.56 | 0.84 | 1.26 | 0.83 | 0.68 | 0.93 | 1.47 | 1.55 | 1.27 | 0.26 | 1.21 |
|  | PD% |  | 0.00 | -0.43 | -6.41 | -11.97 | 1.28 | 1.71 | 2.56 | -3.42 | -7.69 | **4.70** | -0.43 | **1.28** | -3.42 | **-6.41** |

Table - continued

|  |  | **Basal** | **C_0h_1h** | **C_0h_2h** | **OT_0h_1h** | **OT_0h_2h** | **WB_2h** | **C_2h_1h** | **C_2h_2h** | **OT_2h_1h** | **OT_2h_2h** | **WB_4h** | **C_4h_1h** | **C_4h_2h** | **OT_4h_1h** | **OT_4h_2h** |
| --- | --- | --- | --- | --- | --- | --- | --- | --- | --- | --- | --- | --- | --- | --- | --- | --- |
| Participant 5 | Replicate 1 | 29.8 | 29.9 | 30.2 | 26.7 | 26.2 | 29.7 | 29.9 | 29.9 | 28.3 | 26.5 | 29.4 | 29.6 | 29.3 | 27.4 | 26.1 |
|  | Replicate 2 | 29.6 | 29.5 | 29.5 | 27.9 | 26.2 | 29.3 | 29.3 | 29.3 | 28.0 | 26.6 | 29.2 | 28.5 | 28.7 | 27.4 | 26.0 |
|  | Replicate 3 | 29.5 | 29.5 | 29.9 | 28.0 | 26.1 | 29.2 | 29.2 | 29.6 | 27.9 | 26.1 | 29.0 | 28.7 | 28.5 | 27.4 | 26.1 |
|  | Median | 29.6 | 29.5 | 29.9 | 27.9 | 26.2 | 29.3 | 29.3 | 29.6 | 28.0 | 26.5 | 29.2 | 28.7 | 28.7 | 27.4 | 26.1 |
|  | CV% | 0.52 | 0.78 | 1.17 | 2.59 | 0.22 | 0.90 | 1.29 | 1.01 | 0.74 | 1.00 | 0.68 | 2.04 | 1.45 | 0.00 | 0.22 |
|  | PD% |  | -0.34 | 1.01 | -5.74 | -11.49 | -1.01 | -1.01 | 0.00 | -5.41 | -10.47 | -1.35 | -3.04 | -3.04 | -7.43 | -11.82 |
| Participant 6 | Replicate 1 | 25.5 | 24.5 | 24.7 | 22.4 | 21.4 | 25.3 | 24.5 | 23.7 | 23.6 | 22.2 | 24.0 | 22.7 | 22.6 | 21.6 | 20.4 |
|  | Replicate 2 | 24.9 | 24.4 | 24.3 | 22.6 | 21.4 | 24.8 | 24.1 | 23.2 | 23.6 | 21.8 | 23.3 | 22.1 | 21.9 | 21.6 | 20.6 |
|  | Replicate 3 | 25.3 | 23.9 | 23.9 | 22.9 | 21.2 | 24.7 | 24.2 | 23.4 | 23.3 | 21.8 | 23.0 | 22.5 | 22.1 | 21.6 | 20.2 |
|  | Median | 25.3 | 24.4 | 24.3 | 22.6 | 21.4 | 24.8 | 24.2 | 23.4 | 23.6 | 21.8 | 23.3 | 22.5 | 22.1 | 21.6 | 20.4 |
|  | CV% | 1.21 | 1.32 | 1.65 | 1.11 | 0.54 | 1.30 | 0.86 | 1.08 | 0.73 | 1.06 | 2.20 | 1.36 | 1.63 | 0.00 | 0.98 |
|  | PD% |  | -3.56 | -3.95 | **-10.67** | -15.42 | -1.98 | -4.35 | **-7.51** | -6.72 | -13.83 | **-7.91** | **-11.07** | **-12.65** | **-14.62** | **-19.37** |
| Participant 7 | Replicate 1 | 28.3 | 27.7 | 28.3 | 25.6 | 24.9 | 27.3 | 27.9 | 27.8 | 26.7 | 25.0 | 28.1 | 27.5 | 27.0 | 26.0 | 24.3 |
|  | Replicate 2 | 27.8 | 27.7 | 27.4 | 26.5 | 25.1 | 27.1 | 27.8 | 27.5 | 26.5 | 25.0 | 27.3 | 27.2 | 26.6 | 26.0 | 24.7 |
|  | Replicate 3 | 27.5 | 27.6 | 28.0 | 26.0 | 24.7 | 26.9 | 27.3 | 27.0 | 26.6 | 24.6 | 27.5 | 26.8 | 27.1 | 25.8 | 25.0 |
|  | Median | 27.8 | 27.7 | 28.0 | 26.0 | 24.9 | 27.1 | 27.8 | 27.5 | 26.6 | 25.0 | 27.5 | 27.2 | 27.0 | 26.0 | 24.7 |
|  | CV% | 1.45 | 0.21 | 1.64 | 1.73 | 0.80 | 0.74 | 1.16 | 1.47 | 0.38 | 0.92 | 1.51 | 1.29 | 0.98 | 0.44 | 1.42 |
|  | PD% |  | -0.36 | 0.72 | -6.47 | -10.43 | -2.52 | 0.00 | -1.08 | -4.32 | -10.07 | -1.08 | -2.16 | -2.88 | -6.47 | -11.15 |
| Participant 8 | Replicate 1 | 26.6 | 26.8 | 26.7 | 25.0 | 24.2 | 26.3 | 27.0 | 26.5 | 23.5 | 22.2 | 27.0 | 26.8 | 26.0 | 24.3 | 23.2 |
|  | Replicate 2 | 26.8 | 26.4 | 25.9 | 25.0 | 24.2 | 25.4 | 25.8 | 25.8 | 23.9 | 22.4 | 25.9 | 26.2 | 25.9 | 24.2 | 22.9 |
|  | Replicate 3 | 26.5 | 26.4 | 26.1 | 24.9 | 23.8 | 25.2 | 26.4 | 25.9 | 24.0 | 22.5 | 26.0 | 25.9 | 25.5 | 24.2 | 23.5 |
|  | Median | 26.6 | 26.4 | 26.1 | 25.0 | 24.2 | 25.4 | 26.4 | 25.9 | 23.9 | 22.4 | 26.0 | 26.2 | 25.9 | 24.2 | 23.2 |
|  | CV% | 0.57 | 0.87 | 1.60 | 0.23 | 0.95 | 2.31 | 2.27 | 1.46 | 1.11 | 0.68 | 2.34 | 1.75 | 1.02 | 0.24 | 1.29 |
|  | PD% |  | -0.75 | -1.88 | -6.02 | -9.02 | -4.51 | -0.75 | -2.63 | -10.15 | -15.79 | -2.26 | -1.50 | -2.63 | -9.02 | -12.78 |
| Participant 9 | Replicate 1 | 26.7 | 27.6 | 28.0 | 25.0 | 23.6 | 28.2 | 27.7 | 28.0 | 26.5 | 24.9 | 28.1 | 27.6 | 26.0 | 26.2 | 24.7 |
|  | Replicate 2 | 26.7 | 27.7 | 27.8 | 24.8 | 23.3 | 28.0 | 27.1 | 27.4 | 26.4 | 24.8 | 27.5 | 27.2 | 26.4 | 25.8 | 25.1 |
|  | Replicate 3 | 26.2 | 27.1 | 27.7 | 25.1 | 23.6 | 27.6 | 27.0 | 27.6 | 26.4 | 24.8 | 27.3 | 26.7 | 26.3 | 25.6 | 24.7 |
|  | Median | 26.7 | 27.6 | 27.8 | 25.0 | 23.6 | 28.0 | 27.1 | 27.6 | 26.4 | 24.8 | 27.5 | 27.2 | 26.3 | 25.8 | 24.7 |
|  | CV% | 1.08 | 1.16 | 0.55 | 0.61 | 0.73 | 1.09 | 1.40 | 1.11 | 0.22 | 0.23 | 1.51 | 1.66 | 0.79 | 1.18 | 0.93 |
|  | PD% |  | 3.37 | 4.12 | -6.37 | -11.61 | 4.87 | 1.50 | 3.37 | -1.12 | -7.12 | 3.00 | 1.87 | -1.50 | -3.37 | **-7.49** |

Table - continued

|  |  | **Basal** | **C_0h_1h** | **C_0h_2h** | **OT_0h_1h** | **OT_0h_2h** | **WB_2h** | **C_2h_1h** | **C_2h_2h** | **OT_2h_1h** | **OT_2h_2h** | **WB_4h** | **C_4h_1h** | **C_4h_2h** | **OT_4h_1h** | **OT_4h_2h** |
| --- | --- | --- | --- | --- | --- | --- | --- | --- | --- | --- | --- | --- | --- | --- | --- | --- |
| Participant 10 | Replicate 1 | 27.4 | 26.7 | 26.1 | 26.4 | 24.9 | 27.6 | 27.7 | 27.4 | 25.2 | 23.9 | 27.2 | 27.8 | 26.9 | 25.5 | 23.8 |
|  | Replicate 2 | 27.5 | 27.6 | 25.7 | 25.9 | 24.6 | 27.2 | 27.1 | 26.9 | 25.1 | 23.6 | 26.6 | 26.9 | 26.8 | 24.9 | 23.6 |
|  | Replicate 3 | 27.1 | 26.9 | 25.5 | 26.0 | 25.0 | 26.7 | 26.4 | 27.0 | 25.3 | 23.7 | 26.1 | 26.9 | 26.9 | 24.7 | 23.5 |
|  | Median | 27.4 | 26.9 | 25.7 | 26.0 | 24.9 | 27.2 | 27.1 | 27.0 | 25.2 | 23.7 | 26.6 | 26.9 | 26.9 | 24.9 | 23.6 |
|  | CV% | 0.76 | 1.76 | 1.19 | 1.02 | 0.84 | 1.66 | 2.40 | 0.98 | 0.40 | 0.64 | 2.07 | 1.93 | 0.21 | 1.67 | 0.65 |
|  | PD% |  | -1.82 | -6.20 | -5.11 | -9.12 | -0.73 | -1.09 | -1.46 | -8.03 | -13.50 | -2.92 | -1.82 | -1.82 | -9.12 | -13.87 |

Basal – tube centrifuged 30 minutes after collection and analyzed immediately; OT_0h_1h – tube centrifuged 30 minutes after collection and exposed to air for 1 hour; OT_0h_2h - tube centrifuged 30 minutes after collection and exposed to air for 2 hours; C_0h_1h – tube centrifuged 30 minutes after collection and decapped 1 hour after; C_0h_2h - tube centrifuged 30 minutes after collection and decapped 2 hours after; WB_2h - tube centrifuged 2 hours after collection and analyzed immediately; OT_2h_1h - tube centrifuged 2 hours after collection and exposed to air for 1 hour; OT_2h_2h - tube centrifuged 2 hours after collection and exposed to air for 2 hours; C_2h_1h – tube centrifuged 2 hours after collection and decapped 1 hour after; C_2h_2h - tube centrifuged 2 hours after collection and decapped 2 hours after; WB_4h - tube centrifuged 4 hours after collection and analyzed immediately; OT_4h_1h - tube centrifuged 4 hours after collection and exposed to air for 1 hour; OT_4h_2h - tube centrifuged 4 hours after collection and exposed to air for 2 hours; C_4h_1h – tube centrifuged 4 hours after collection and decapped 1 hour after; C_4h_2h - tube centrifuged 4 hours after collection and decapped 2 hours after.
